# Supplementary material
Source: PubMed Central journal article supplement (PMC2453706)
Supplement: 0710146105_SD1.pdf [file 0710146105_SD1.pdf]

## SI Appendix

**Derivation 1. A prediction of our model is that mutation of C2394 will confer a greater fold-effect on  $K_{1/2}$  than on  $k_{\text{trans}}$ , given certain assumptions.**

$K_{1/2}$  and  $k_{\text{trans}}$  of translocation are differentially affected by mutations on C2394 of 23S rRNA. In order to better understand these differential effects, we simplified our model by combining the initial binding and GTP hydrolysis steps (Scheme 1).

**Scheme 1.**

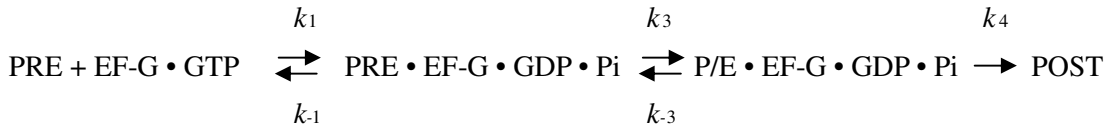

$K_{1/2}$  and  $k_{\text{trans}}$  of translocation can be approximated as follows, using the concept of net rate constants (Gromadski & Rodnina, 2004; Cleland, 1975):

$$K_{1/2} = \frac{k_{-1}k_{-3} + k_{-1}k_4 + k_3k_4}{k_1(k_3 + k_{-3} + k_4)} \approx \frac{k_{-1}(k_{-3} + k_4)}{k_1(k_3 + k_{-3} + k_4)} \quad (\text{assuming } k_{-1} \gg k_3) \quad (\text{eqn. 1})$$

$$k_{\text{trans}} = \frac{k_3k_4}{k_3 + k_{-3} + k_4} \quad (\text{eqn. 2})$$

Here, the ratio ( $R$ ) of fold effects of each mutation on  $K_{1/2}$  to fold-effects on  $k_{\text{trans}}$  is defined as follows:

$$R = \frac{K_{1/2}'/K_{1/2}}{k_{\text{trans}}'/k_{\text{trans}}} \quad (\text{eqn. 3})$$

where  $K_{1/2}$  and  $k_{\text{trans}}$  are those of wild-type complexes, and  $K_{1/2}'$  and  $k_{\text{trans}}'$  are those of mutant complexes. When  $R > 1$  (or  $R - 1 > 0$ ), the fold effect of a given mutation on  $K_{1/2}$  is greater than the fold-effect on  $k_{\text{trans}}$ , and when  $R < 1$  (or  $R - 1 < 0$ ), the opposite is true. Assuming that the C2394 mutations affect the P/P  $\rightleftharpoons$  P/E equilibrium ( $k_3$  and  $k_{-3}$ ),  $K_{1/2}'$  and  $k_{\text{trans}}'$  are

defined as follows:

$$K_{1/2}' \approx \frac{k_{-1}(k_{-3}'+k_4)}{k_1(k_3'+k_{-3}'+k_4)} \quad (\text{eqn. 4})$$

$$k_{\text{trans}}' = \frac{k_3'k_4}{k_3'+k_{-3}'+k_4} \quad (\text{eqn. 5})$$

where  $k_3'$  and  $k_{-3}'$  are forward and reverse rate constants of the P/P  $\rightleftharpoons$  P/E equilibrium in the mutant complexes, and the other rate constants are equivalent to corresponding rates of wild-type complexes. Using eqn. 1, 2, 4, and 5,  $R - 1$  is expressed as a function of individual rate constants:

$$R - 1 = A \cdot \left( \left( \frac{1}{x} + x \right) - \left( \frac{1}{x'} + x' \right) \right) \quad (\text{eqn. 6})$$

where

$$A = \frac{k_3'(k_{-3}'+k_4)}{(k_3'+k_{-3}'+k_4)^2} \quad (> 0)$$

$$x = \frac{k_{-3} + k_4}{k_3}$$

$$x' = \frac{k_{-3}'+k_4}{k_3'}$$

Thus, according to eqn. 6, when  $\frac{1}{x} + x > \frac{1}{x'} + x'$ , then  $R > 1$ , or  $\frac{K_{1/2}'}{K_{1/2}} > \frac{k_{\text{trans}}}{k_{\text{trans}}'}$ , and *vice versa*.

Examples of individual rate constants that satisfy the above relationships are listed below.

**Example 1:**  $k_3 = 50$ ,  $k_{-3} = 1$ ,  $k_4 = 5$ ,  $k_3' = 2$ ,  $k_{-3}' = 1$  ( $k_3'$  decreased)

$$\frac{1}{x} + x = 8.5 > \frac{1}{x'} + x' = 3.3, \text{ and } \frac{K_{1/2}'}{K_{1/2}} = 7.0 > \frac{k_{\text{trans}}}{k_{\text{trans}}'} = 3.6 \quad (R = 2.0)$$

**Example 2:**  $k_3 = 50$ ,  $k_{-3} = 1$ ,  $k_4 = 5$ ,  $k_3' = 50$ ,  $k_{-3}' = 200$  ( $k_{-3}'$  increased)

$$\frac{1}{x} + x = 5.2 > \frac{1}{x'} + x' = 2.0, \text{ and } \frac{K_{1/2}'}{K_{1/2}} = 7.5 > \frac{k_{\text{trans}}}{k_{\text{trans}}'} = 4.6 \quad (R = 1.6)$$

**Example 3:**  $k_3 = 100$ ,  $k_{-3} = 1$ ,  $k_4 = 5$ ,  $k_3' = 5$ ,  $k_{-3}' = 30$  ( $k_3'$  decreased,  $k_{-3}'$  increased)

$$\frac{1}{x} + x = 16 > \frac{1}{x'} + x' = 7.1, \text{ and } \frac{K_{1/2}'}{K_{1/2}} = 15 > \frac{k_{\text{trans}}}{k_{\text{trans}}'} = 7.5 \quad (R = 2.0)$$

Thus, according to our model, mutations that shift the P/P  $\leftrightarrow$  P/E equilibrium to the left can confer a larger fold-effect on  $K_{1/2}$  than on  $k_{\text{trans}}$ .

**Derivation 2. Inhibition of A/P formation is predicted to confer a greater fold-effect on  $k_{\text{trans}}$  than on  $K_{1/2}$ .**

Inhibition of A/P formation results in decreased  $k_4$  in Scheme 1. Here, we define  $K_{1/2}'$  and  $k_{\text{trans}}'$  as follows:

$$K_{1/2}' \approx \frac{k_{-1}(k_{-3} + k_4')}{k_1(k_3 + k_{-3} + k_4')} \quad (\text{assuming } k_{-1} \gg k_3) \quad (\text{eqn. 7})$$

$$k_{\text{trans}}' = \frac{k_3 k_4'}{k_3 + k_{-3} + k_4'} \quad (\text{eqn. 8})$$

where  $K_{1/2}'$ ,  $k_{\text{trans}}'$ , and  $k_4'$  are  $K_{1/2}$ ,  $k_{\text{trans}}$ , and  $k_4$ , respectively, when A/P formation is inhibited. By using eqn. 7 and 8,  $R - 1$  is calculated as follows:

$$R - 1 = \frac{K_{1/2}'/K_{1/2}}{k_{\text{trans}}/k_{\text{trans}}'} - 1 = B \cdot y \quad (\text{eqn. 9})$$

where

$$B = \frac{k_4'(k_{-3} + k_4')}{(k_3 + k_{-3} + k_4')^2} \quad (> 0)$$

$$y = \left( \frac{k_3 + k_{-3}}{k_4} + 1 \right) \left( \frac{k_3}{k_{-3} + k_4} + 1 \right) - \left( \frac{k_3 + k_{-3}}{k_4'} + 1 \right) \left( \frac{k_3}{k_{-3} + k_4'} + 1 \right) \quad (< 0, \text{ because } k_4 > k_4')$$

Thus,  $R < 1$ , or  $\frac{K_{1/2}'}{K_{1/2}} < \frac{k_{\text{trans}}}{k_{\text{trans}}'}$ . This indicates that according to our model, at least if  $k_{-1} \gg k_3$ ,

inhibition of A/P formation always confers a larger fold-effect on  $k_{\text{trans}}$  than on  $K_{1/2}$ , which was the trend observed experimentally.

**Derivation 3. Consideration of an alternative model in which EF-G • GDP can dissociate from the PRE complex**

**Scheme 2.**

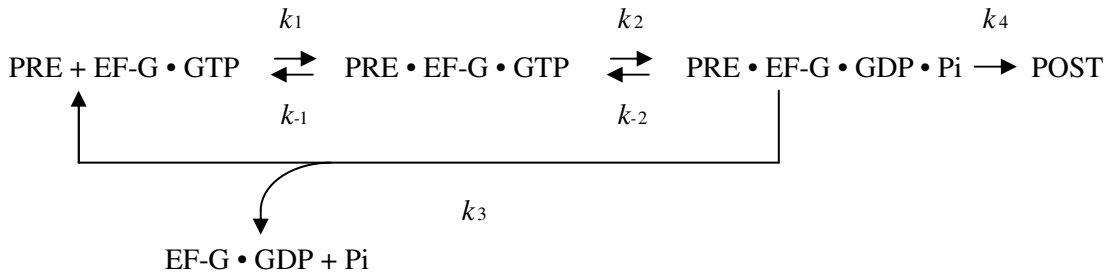

In this scheme, non-productive GTP hydrolysis events precede the tRNA/mRNA movement, and the C2394 mutations change the efficiency of catalysis by simply increasing the number of turnover events before translocation occurs. Multiple turnover of GTP hydrolysis is possible because excess EF-G and GTP are present in our experiments. When a rapid equilibrium of initial turnover is assumed, a fraction of each component of the equilibrium at time  $t$  is calculated by using the graphical method of King and Altman (King & Altman, 1956).

$$\frac{[\text{PRE} \cdot \text{EF-G} \cdot \text{GTP}]}{[\text{PRE}]_t} = \frac{(k_{-2} + k_3)k_1[\text{EF-G} \cdot \text{GTP}]}{((k_2 + k_{-2} + k_3)k_1[\text{EF-G} \cdot \text{GTP}] + k_{-1}k_{-2} + k_{-1}k_3 + k_2k_3)} \quad (\text{eqn. 10})$$

$$\frac{[\text{PRE} \cdot \text{EF-G} \cdot \text{GDP} \cdot \text{Pi}]}{[\text{PRE}]_t} = \frac{k_1k_2[\text{EF-G} \cdot \text{GTP}]}{((k_2 + k_{-2} + k_3)k_1[\text{EF-G} \cdot \text{GTP}] + k_{-1}k_{-2} + k_{-1}k_3 + k_2k_3)} \quad (\text{eqn. 11})$$

where  $[\text{PRE}]_t = [\text{PRE}] + [\text{PRE} \cdot \text{EF-G} \cdot \text{GTP}] + [\text{PRE} \cdot \text{EF-G} \cdot \text{GDP} \cdot \text{Pi}]$ . Time-dependent change of [GDP] can be calculated as follows:

$$\frac{d[\text{GDP}]}{dt} = \frac{d[\text{EF-G} \cdot \text{GDP}]}{dt} + \frac{d[\text{PRE} \cdot \text{EF-G} \cdot \text{GDP} \cdot \text{Pi}]}{dt} + \frac{d[\text{POST} \cdot \text{EF-G} \cdot \text{GDP}]}{dt} \quad (\text{eqn. 12})$$

where

$$\frac{d[\text{EF-G} \cdot \text{GDP}]}{dt} = k_3[\text{PRE} \cdot \text{EF-G} \cdot \text{GDP} \cdot \text{Pi}]$$

$$\frac{d[\text{PRE} \cdot \text{EF-G} \cdot \text{GDP} \cdot \text{Pi}]}{dt} = k_2[\text{PRE} \cdot \text{EF-G} \cdot \text{GTP}] - (k_{-2} + k_3 + k_4)[\text{PRE} \cdot \text{EF-G} \cdot \text{GDP} \cdot \text{Pi}]$$

$$\frac{d[\text{POST} \cdot \text{EF-G} \cdot \text{GDP}]}{dt} = k_4[\text{PRE} \cdot \text{EF-G} \cdot \text{GDP} \cdot \text{Pi}]$$

Substitution and rearrangement of eqn. 12 yields:

$$\frac{d[\text{GDP}]}{dt} = k_2[\text{PRE} \cdot \text{EF-G} \cdot \text{GTP}] - k_{-2}[\text{PRE} \cdot \text{EF-G} \cdot \text{GDP} \cdot \text{Pi}] \quad (\text{eqn. 13})$$

Using eqn. 10 and 11,

$$\frac{d[\text{GDP}]}{dt} = \frac{k_1 k_2 k_3 [\text{EF-G} \cdot \text{GTP}]}{((k_2 + k_{-2} + k_3) k_1 [\text{EF-G} \cdot \text{GTP}] + k_{-1} k_{-2} + k_{-1} k_3 + k_2 k_3)} [\text{PRE}]_t \quad (\text{eqn. 14})$$

Simplifying eqn. 14 yields:

$$\frac{d[\text{GDP}]}{dt} = f([\text{EF-G} \cdot \text{GTP}]) [\text{PRE}]_t \quad (\text{eqn. 15})$$

where

$$f([\text{EF-G} \cdot \text{GTP}]) = \frac{k_1 k_2 k_3 [\text{EF-G} \cdot \text{GTP}]}{((k_2 + k_{-2} + k_3) k_1 [\text{EF-G} \cdot \text{GTP}] + k_{-1} k_{-2} + k_{-1} k_3 + k_2 k_3)}$$

Here,  $[\text{PRE}]_t = [\text{PRE}]_0 \cdot \exp(-k_{\text{app}} \cdot t)$ , where  $k_{\text{app}}$  is the apparent rate of translocation, and  $[\text{PRE}]_0$  is  $[\text{PRE}]$  at  $t = 0$ . Eqn. 15 is converted to:

$$\frac{d[\text{GDP}]}{dt} = f([\text{EF-G} \cdot \text{GTP}] \cdot [\text{PRE}]_0 \cdot \exp(-k_{\text{app}} \cdot t)) \quad (\text{eqn. 16})$$

At a given concentration of EF-G · GTP,  $k_{\text{app}}$  and  $f([\text{EF-G} \cdot \text{GTP}] \cdot [\text{PRE}]_0)$  are constant. Therefore, assuming  $[\text{GDP}] = 0$  at  $t = 0$ , integration of eqn. 16 yields:

$$[\text{GDP}] = \frac{f([\text{EF-G} \cdot \text{GTP}] \cdot [\text{PRE}]_0)}{k_{\text{app}}} (1 - \exp(-k_{\text{app}} \cdot t)) \quad (\text{eqn. 17})$$

This indicates that, according to Scheme 2, the apparent rate of GTP hydrolysis is equivalent to that of translocation, which contradicts our results and previous reports (Rodnina *et al.*, 1997; Savelsbergh *et al.*, 2000; Savelsbergh *et al.*, 2003; Seo *et al.*, 2006). Thus, it is likely that the GDP form of EF-G does not dissociate from the complex until translocation occurs.

## References

- Cleland, W. W. (2005) *Biochemistry* 14:3220-3224.
- Gromadski, K. B. & Rodnina, M. V. (2004) *Mol Cell* 13:191-200.
- King, E. L. & Altman, C. (1956) *J Phys Chem* 60:1375-1378.
- Rodnina, M. V., Savelsbergh, A., Katunin, V. I., Wintermeyer, W. (1997) *Nature* 385:37-41.
- Savelsbergh, A., Matassova, N. B., Rodnina, M. V., Wintermeyer, W. (2000) *J Mol Biol* 300:951-961
- Savelsbergh, A., Katunin, V. I., Mohr, D., Peske, F., Rodnina, M. V., Wintermeyer, W. (2003) *Mol Cell* 11:1517-1523.
- Seo, H. S., Abedin, S., Kamp, D., Wilson, D. N., Nierhaus, K. H., Cooperman, B. S. (2006) *Biochemistry* 45:2504-2514.
